# Supplementary material for: DisA Limits RecG Activities at Stalled or Reversed Replication Forks
Source: MDPI journal article supplement (doi:10.3390/cells10061357), 2021-05-31
Supplement: s1 [file s1]

Supplementary material

Article

# DisA Limits RecG Activities at Stalled or Reversed Replication Forks

Rubén Torres, Carolina Gándara †, Begoña Carrasco, Ignacio Baquedano ‡, Silvia Ayora and Juan C. Alonso \*

Department of Microbial Biotechnology, Centro Nacional de Biotecnología, CNB-CSIC, 28049 Madrid, Spain; rtorres@cnb.csic.es (R.T.); carolina.gandara@newcellsbiotech.co.uk (C.G.); bcarrasc@cnb.csic.es (B.C.); ignacio.baquedano@ua.es (I.B.); sayora@cnb.csic.es (S.A.)  
 † Present address: Newcells Biotech Ltd., Newcastle Helix, Newcastle-upon-Tyne NE4 5BX, UK  
 ‡ Present address: Departamento de Fisiología, Genética y Microbiología. Universidad de Alicante. 03690 San Vicente del Raspeig, Alicante, Spain  
 \* Correspondence: jcalonso@cnb.csic.es

**Table S1.** Oligonucleotides used

| Name       | Sequence 5'→3' polarity                                                                                          |
|------------|------------------------------------------------------------------------------------------------------------------|
| J3-1       | CGCAAGCGACAGGAACCTCGAGAAGCTTCCGGTAGCAGCCTGAGCGGTGGTTGAATTCCTC<br>GAGGTTCTGTCGCTTGCG                              |
| J3-2       | CGCAAGCGACAGGAACCTCGAGGAATTCAACCACCGCTCAACTCAACTGCAGTCTAGACTC<br>GAGGTTCTGTCGCTTGCG                              |
| J3-3       | CGCAAGCGACAGGAACCTCGAGTCTAGACTGCAGTTGAGTCCTTGCTAGGACGGATCCCTC<br>GAGGTTCTGTCGCTTGCG                              |
| J3-4       | CGCAAGCGACAGGAACCTCGAGGGATCCGTCCTAGCAAGGGGTGCTACCGGAAGCTTCTC<br>GAGGTTCTGTCGCTTGCG                               |
| J3-2-110   | CGCAAGCGACAGGAACCTCGAGGAATTCAACCACCGCTCAACTCAACTGCAGTCTAGACTC<br>GAGGTTCTGTCGCTTGCGAAGTCTTCCGGCATCGATCGTAGCTATT  |
| J3-2-110-5 | AAGTCTTTCGGCATCGATCGTAGCTATTTCGCAAGCGACAGGAACCTCGAGGAATTCAAC<br>CACCGCTCAACTCAACTGCAGTCTAGACTCGAGGTTCTGTCGCTTGCG |
| J170       | AGACGCTGCCGAATTCTGGCTTGATCTGATGCTGTCTAGAGGCCTCCACTATGAAATCG                                                      |
| J173       | AGTCATAGATCGATAGTCTCTAGACAGCATCAGATCCAAGCCAGAATTCGGCAGCGTCT                                                      |
| J345       | GCGATTCATAGTGGAGGCCTCTAGACAGCAGCCGTTGAATGGCGGATGCTAATTACTAT<br>CTC                                               |
| J346       | GAGATAGTAATTAGCATCCGCCATTCAACGGCGTGCTGTCTAGAGACTATCGATCTATGAG<br>CTCTGCAGC                                       |
| 171        | CGATTTCATAGTGGAGGCCTCTAGACAGCA                                                                                   |
| 172        | TGCTGTCTAGAGACTATCGATCTATGAGCT                                                                                   |
| 171-15     | CGATTTCATAGTGGA                                                                                                  |
| 172-15     | ATCGATCTATGAGCT                                                                                                  |

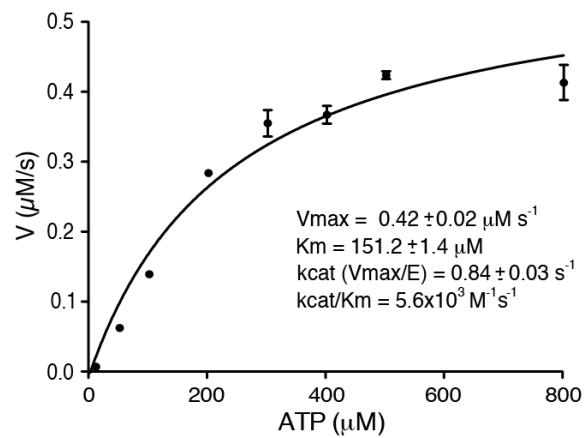

**Figure S1.** DisA DAC activity at different ATP concentrations. DisA (25 nM) was incubated in buffer C containing 10 mM MgCl<sub>2</sub> and increasing ATP concentrations (at a ratio of 1:2000, 1:4000 or 1:8000 [ $\alpha^{32}\text{P}$ ]-ATP:ATP) for 30 min at 37 °C. Samples were separated by TLC. Spots corresponding to ATP and c-di-AMP were quantified using the ImageJ (NIH) program, and data, which are plotted in a Michaelis-Menten kinetic curve, are the mean  $\pm$  SD of  $>3$  independent experiments. The obtained kinetic parameters for DisA-mediated c-di-AMP synthesis are shown.

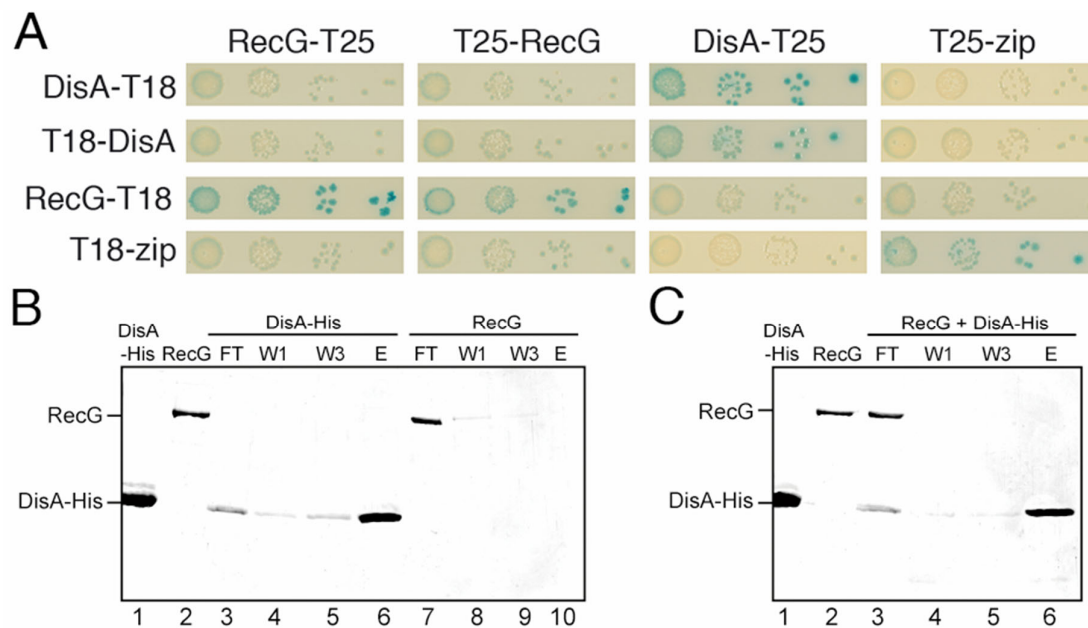

**Figure 2.** DisA does not form a stable complex with RecG. **(A)** Bacterial two-hybrid interaction assays were done by co-transforming a pair of plasmids expressing DisA, RecG or the Zip control fused at the N- or C-terminus, to either the T18 or T25 domain of the adenylate cyclase. Dilutions of co-transformants were incubated on plates supplemented with IPTG and X-Gal. A positive interaction (appearance of blue color) is considered when the pair of fusion proteins reconstitutes the adenylate cyclase to generate cAMP, which then activates the cAMP-bound catabolite activator protein to induce the expression of  $\beta$ -galactosidase. Different dilutions were spotted onto LB plates supplemented with ampicillin, kanamycin, streptomycin, 0.5 mM IPTG and 10% X-Gal. The plates were then incubated at 25 °C for 3–4 days. Each co-transformation was performed at least in triplicate and a representative result is shown. **(B)** His-tagged DisA (1  $\mu$ g) or RecG (0.5  $\mu$ g) was loaded onto a 50  $\mu$ l  $\text{Ni}^{2+}$  matrix in buffer B, and the FT was collected. The  $\text{Ni}^{2+}$  matrix was washed three times with four column volumes of buffer B containing 20 mM imidazole (W), and the bound proteins were finally eluted with Buffer B containing 0.4 M imidazole. **(C)** His-tagged DisA was first incubated with RecG in buffer B (5 min, 37°C), and then the mixture was loaded onto a 50  $\mu$ l  $\text{Ni}^{2+}$  matrix. The FT was collected, and three washes at 20 mM imidazole were performed. Finally, bound His-tagged DisA was eluted with Buffer B containing 0.4 M imidazole. The experiment was repeated three times with similar results, and a representative gel is shown here.

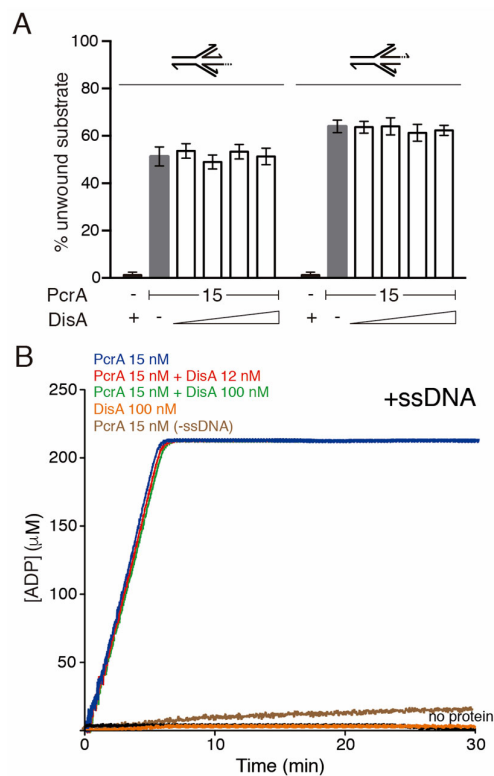

**Figure S3.** The activities of the PcrA helicase are not regulated by DisA. **(A)** PcrA-mediated helicase assays with a 5'-tail HJ DNA (it mimics a regressed fork with the nascent lagging-strand 30-nt longer than the nascent lagging-strand) or a 3'-tail HJ DNA (regressed fork with the nascent leading-strand 30-nt longer than the nascent lagging-strand). The DNA was incubated with PcrA (15 nM) and increasing concentrations of DisA (12–100 nM). Reactions were done in buffer B containing 10 mM MgCl<sub>2</sub> and 2 mM ATP (15 min, 30 °C), and after deproteinization the substrate and products were separated by 6% PAGE and visualized by phosphor imaging. The quantification values of unwound DNA and the SD of >3 independent experiments are documented. Abbreviations: - and +, absence and presence of the indicated protein. **(B)** PcrA-mediated ATP hydrolysis in the presence of DisA. Reactions had 15 nM PcrA, the indicated DisA concentrations and circular 3,199-nt ssDNA (10 μM in nt) in buffer D containing the ATP regeneration system. Reactions were started by addition of ATP (5 mM), and the ATPase activity was measured (30 min at 37 °C). All reactions were repeated three or more times with similar results. A representative graph is shown here, and quantifications of the ATP hydrolysis rates are shown in the main text as the mean ± SD of >3 independent experiments.
